# Supplementary material
Source: Springer Nature journal article supplement (https://www.springermedizin.de/resource/supplementary/12885_2009_2800_MOESM1_ESM.pdf/9461954)

V1 V2 V3 V4 V5 V6 V7 V8 V9 V10

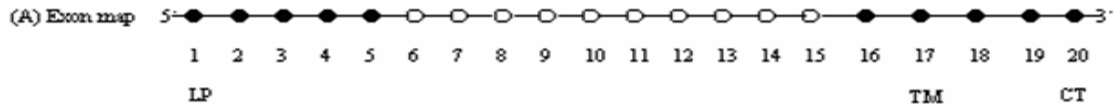

(B) Alternatively spliced transcripts

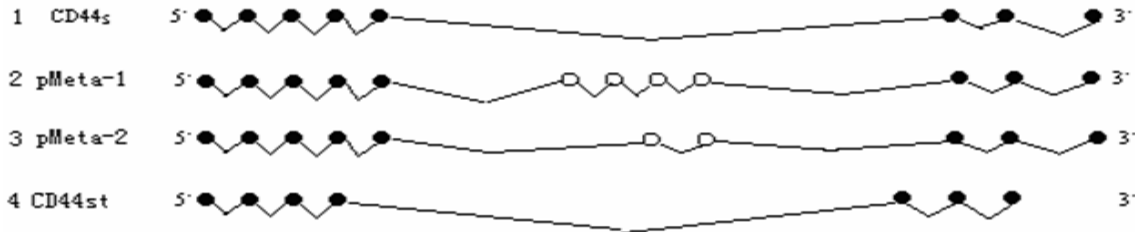

Supplement: MOESM1 [file 9461954]
